# Supplementary material for: High-Risk Obesity Phenotypes: Target for Multimorbidity Prevention at the ROFEMI Study
Source: MDPI journal article supplement (doi:10.3390/jcm11164644), 2022-08-09
Supplement: s1 [file s1]

**Table S1. Qualitative Variables by Groups**

| <b>Variable<br/>(Absolute number<br/>(percentage))</b> | <b>Group 1<br/>n=74</b> | <b>Group 2<br/>n=462</b> | <b><i>p</i></b>      |
|--------------------------------------------------------|-------------------------|--------------------------|----------------------|
| Sex (women)                                            | 58 (78.4)               | 216 (46.7)               | <b><i>0.000</i></b>  |
| Smoker                                                 | 9 (12.2)                | 72 (15.6)                | 0.44                 |
| Education level                                        | (n=72)                  | (n=453)                  |                      |
| Illiterate                                             | 3 (4.2)                 | 33 (7.3)                 |                      |
| Primary                                                | 41 (56.9)               | 190 (41.9)               |                      |
| Secondary                                              | 19 (26.4)               | 170 (37.5)               | 0.10                 |
| University                                             | 9 (12.5)                | 60 (13.2)                |                      |
| Employed                                               | 27 (36.5)               | 177 (38.4)               | 0.7                  |
| Origin (Urban)                                         | 50 (67.6)               | 349 (75.5)               | 0.14                 |
| Physical activity                                      | 19 (25.7)               | 157 (33.9)               | 0.15                 |
| HBP                                                    | 49 (66.2)               | 331 (71.6)               | 0.33                 |
| T2DM                                                   | 22 (29.7)               | 199 (43.1)               | <b><i>0.03</i></b>   |
| Dyslipidemia                                           | 41 (55.4)               | 313 (43.1)               | <b><i>0.03</i></b>   |
| Hyperuricemia                                          | 2 (2.7)                 | 102 (22.2)               | <b><i>0.0001</i></b> |
| HFpEF                                                  | 9 (12.2)                | 69 (14.9)                | 0.39                 |
| HFrEF                                                  | 1 (1.3)                 | 19 (4.1)                 | 0.39                 |
| CAD                                                    | 8 (10.8)                | 42 (9.1)                 | 0.63                 |
| Stroke                                                 | 5 (6.8)                 | 35 (7.6)                 | 0.8                  |
| Gastroesophageal reflux disease                        | 16 (21.6)               | 67 (14.5)                | 0.11                 |
| COPD/Asthma                                            | 7 (9.5)                 | 48 (10.4)                | 0.8                  |
| Cancer                                                 | 1 (1.35)                | 13 (2.8)                 | 0.46                 |
| Arthrosis                                              | 29 (39.2)               | 141 (30.5)               | 0.14                 |
| Depression                                             | 17 (22.9)               | 98 (21.3)                | 0.73                 |
| Disability                                             |                         |                          |                      |
| Moderate                                               | 13 (17.6)               | 93 (20.3)                | 0.8                  |
| Severe                                                 | 6 (8.1)                 | 42 (9.15)                | 0.8                  |
| Previous treatment                                     |                         |                          |                      |
| Glucocorticoids                                        | 5 (6.8)                 | 28 (6.1)                 | 0.82                 |
| Metformin                                              | 17 (22.9)               | 156 (33.9)               | 0.06                 |
| Sulfonylureas                                          | 4 (5.4)                 | 9 (1.9)                  | 0.07                 |
| DPP-4 inhibitors                                       | 4 (5.4)                 | 38 (8.3)                 | 0.39                 |
| GLP-1 RA                                               | 6 (8.1)                 | 78 (16.9)                | 0.05                 |
| SGLT2 inhibitors                                       | 9 (12.2)                | 79 (17.2)                | 0.27                 |
| Insulin                                                | 12 (16.2)               | 54 (11.7)                | 0.27                 |
| Statins                                                | 35 (47.3)               | 259 (56.3)               | 0.14                 |
| IBP                                                    | 45 (60.8)               | 231 (50.2)               | 0.09                 |
| Antihypertensives                                      | 47 (63.5)               | 325 (70.8)               | 0.2                  |
| NSAIDs                                                 | 17 (22.9)               | 65 (14.2)                | 0.05                 |
| Antidepressants                                        | 21 (28.4)               | 104 (22.6)               | 0.28                 |

**Legend:** CAD: coronary artery disease; COPD: chronic obstructive pulmonary disease; DPP-4 inhibitors: dipeptidyl-dipeptidase 4 inhibitors; GLP-1 RA: glucagon like peptide-1 receptor agonist; HBP: high blood pressure; HFpEF: heart failure with preserved ejection fraction; HFrEF: heart failure with reduced ejection fraction; IBP: proton pump inhibitors; NSAIDs: nonsteroidal anti-inflammatory drugs; SGLT2 inhibitors:

sodium-glucose cotransporter 2 inhibitors; T2DM: type 2 diabetes mellitus. Data are expressed by absolute number and percentage.

**Table S2. Quantitative Variables by Groups**

| <b>Variable<br/>(median/interquartile<br/>range)</b> | <b>Group 1<br/>n= 74</b> | <b>Group 2<br/>n=462</b> | <b><i>p</i></b> |
|------------------------------------------------------|--------------------------|--------------------------|-----------------|
| Age (years)                                          | 61 (27)                  | 62 (22)                  | 0.87            |
| Weight (Kg)                                          | 79.9 (11)                | 97 (22)                  | <b>0.0000</b>   |
| BMI (Kg/m <sup>2</sup> )                             | 31.3 (3.7)               | 34.7 (6.9)               | <b>0.0000</b>   |
| WC (cm)                                              | 97.5 (10)                | 112 (13.5)               | <b>0.0000</b>   |
| Charlson                                             | 1 (2)                    | 1 (3)                    | <b>0.002</b>    |
| FPG (mg/dL)                                          | 100 (26)                 | 104 (32)                 | <b>0.04</b>     |
| HbA1c (%)                                            | 5.8 (0.7)                | 5.9 (1.3)                | 0.32            |
| eGFR (ml/min/1.73m <sup>2</sup> )                    | 86.3 (27.3)              | 84.1 (36)                | 0.29            |
| Uric acid (mg/dL)                                    | 5 (1.8)                  | 5.8 (2.5)                | <b>0.0000</b>   |
| hsCRP<br>(mg/dL)                                     | 2 (4)                    | 3 (5.5)                  | 0.36            |
| LDL-c<br>(mg/dL)                                     | 107 (60)                 | 97 (52)                  | 0.57            |
| HDL-c<br>(mg/dL)                                     | 52 (17)                  | 46 (16)                  | <b>0.0001</b>   |
| Triglycerides (mg/dL)                                | 114 (72)                 | 136 (86)                 | <b>0.002</b>    |
| TyG index                                            | 8.6 (0.8)                | 9.6 (0.7)                | <b>0.003</b>    |
| AST (U/L)                                            | 22 (17)                  | 22 (17)                  | 0.6             |
| ALT (U/L)                                            | 21.5 (20.5)              | 21 (12.7)                | 0.56            |
| GGT (U/L)                                            | 25 (47.5)                | 32 (31)                  | 0.07            |
| ALP (U/L)                                            | 81.5 (42)                | 79 (35)                  | 0.53            |
| Hemoglobin (g/dL)                                    | 13.7 (2)                 | 14 (2.3)                 | <b>0.001</b>    |
| Leukocytes (x10 <sup>9</sup> /L)                     | 6.8 (2.97)               | 7.4 (2.8)                | <b>0.01</b>     |
| Lymphocytes (x10 <sup>9</sup> /L)                    | 2.12 (1.2)               | 2.13 (1.1)               | 0.53            |
| Platelets (x10 <sup>9</sup> /L)                      | 228 (82)                 | 237 (97)                 | 0.33            |
| Albumin (g/dL)                                       | 4.2 (0.5)                | 4.3 (0.5)                | 0.06            |
| UACR (mg/g)                                          | 11.1 (17.1)              | 9.4 (19.4)               | 0.8             |
| Drugs number                                         | 6 (6)                    | 7 (6.25)                 | <b>0.79</b>     |

**Legend:** ALP: alkaline phosphatase; ALT: Alanine transaminase; AST: Aspartate transaminase; BMI: body mass index; eGFR: estimated glomerular filtration rate; FPG: Fasting plasma glucose; GGT: gamma-glutamyl transferase; HbA1c: glycated hemoglobin; HDL-C: high density lipoprotein cholesterol; hsCRP: high-sensitivity C-reactive protein; LDL-C: low density lipoprotein cholesterol; TyG index: triglyceride-glucose index; UACR: Urinary albumin-to-creatinine ratio; WC: waist circumference. Data is expressed as median and interquartile range since non normality of the data.
